# Supplementary material for: Using Deep Learning and Multi-source Remote Sensing Images to Map Landlocked Lakes in Antarctica
Source: Copernicus journal article supplement (doi:10.5194/egusphere-2023-1810), 2023-09-28
Supplement: Supplementary file 1 [file egusphere-2023-1810-supplement.pdf]

# Supplementary Information

5 **Table S1. The normalized backscatters in SAR images. We sampled the land ice and sea ice with obviously lower backscatters, as opposed to sampling randomly. The backscatter averages of sampled land ice during September and December are similar to those of sampled landlocked lakes' open water (LLOW) during January.**

| <b>Image</b>   | <b>Land cover</b> | <b>Sample size</b> | <b>Min</b> | <b>Mean</b> |
|----------------|-------------------|--------------------|------------|-------------|
| VHs_2019_10_02 | Land ice          | 146059             | -1.83      | -1.41       |
|                | Sea water         | 392647             | -1.87      | -1.55       |
|                | Sea ice           | 585496             | -1.88      | -1.60       |
| VHs_2017_11_06 | Land ice          | 32353              | -1.76      | -1.34       |
|                | Sea water         | 1225456            | -1.75      | -0.95       |
|                | Sea ice           | 448936             | -1.79      | -1.19       |
| LHs_2019_11_28 | Land ice          | 2444               | -1.70      | -0.95       |
|                | Sea water         | 110285             | -1.86      | -1.63       |
|                | Sea ice           | 248556             | -1.85      | -1.48       |
| LHs_2018_01_25 | LLOW              | 1435               | -1.69      | -1.31       |
| LHs_2017_01_22 | LLOW              | 3302               | -1.75      | -1.37       |

**Table S2. The miss error percentage of landlocked lakes' open water (LLOW) identification in the testing dataset. The percentage is the ratio of the ground truth area to the false negative results area.**

| <b>Study Area</b> | <b>&gt; 10000 m<sup>2</sup> area</b> | <b>1000-10000 m<sup>2</sup> area</b> | <b>&lt; 1000 m<sup>2</sup> area</b> |
|-------------------|--------------------------------------|--------------------------------------|-------------------------------------|
| CWM               | 0.23                                 | 0.35                                 | 0.57                                |
| LHs               | 0.28                                 | 0.47                                 | 0.64                                |
| VHs               | 0.48                                 | 0.76                                 | 0.69                                |
| SO                | 0.38                                 | 0.61                                 | 0.65                                |

10
